# Supplementary material for: Characterization of long-term patient-reported symptoms of COVID-19: an analysis of social media data
Source: bioRxiv or medRxiv preprint supplement (doi:10.1101/2021.07.13.21260449), 2021-07-15
Supplement: Supplementary file [file media-1.pdf]

Appendix: PRISMA flow diagram for long hauler user identification (step 1) and manual tweet annotation (step 2)

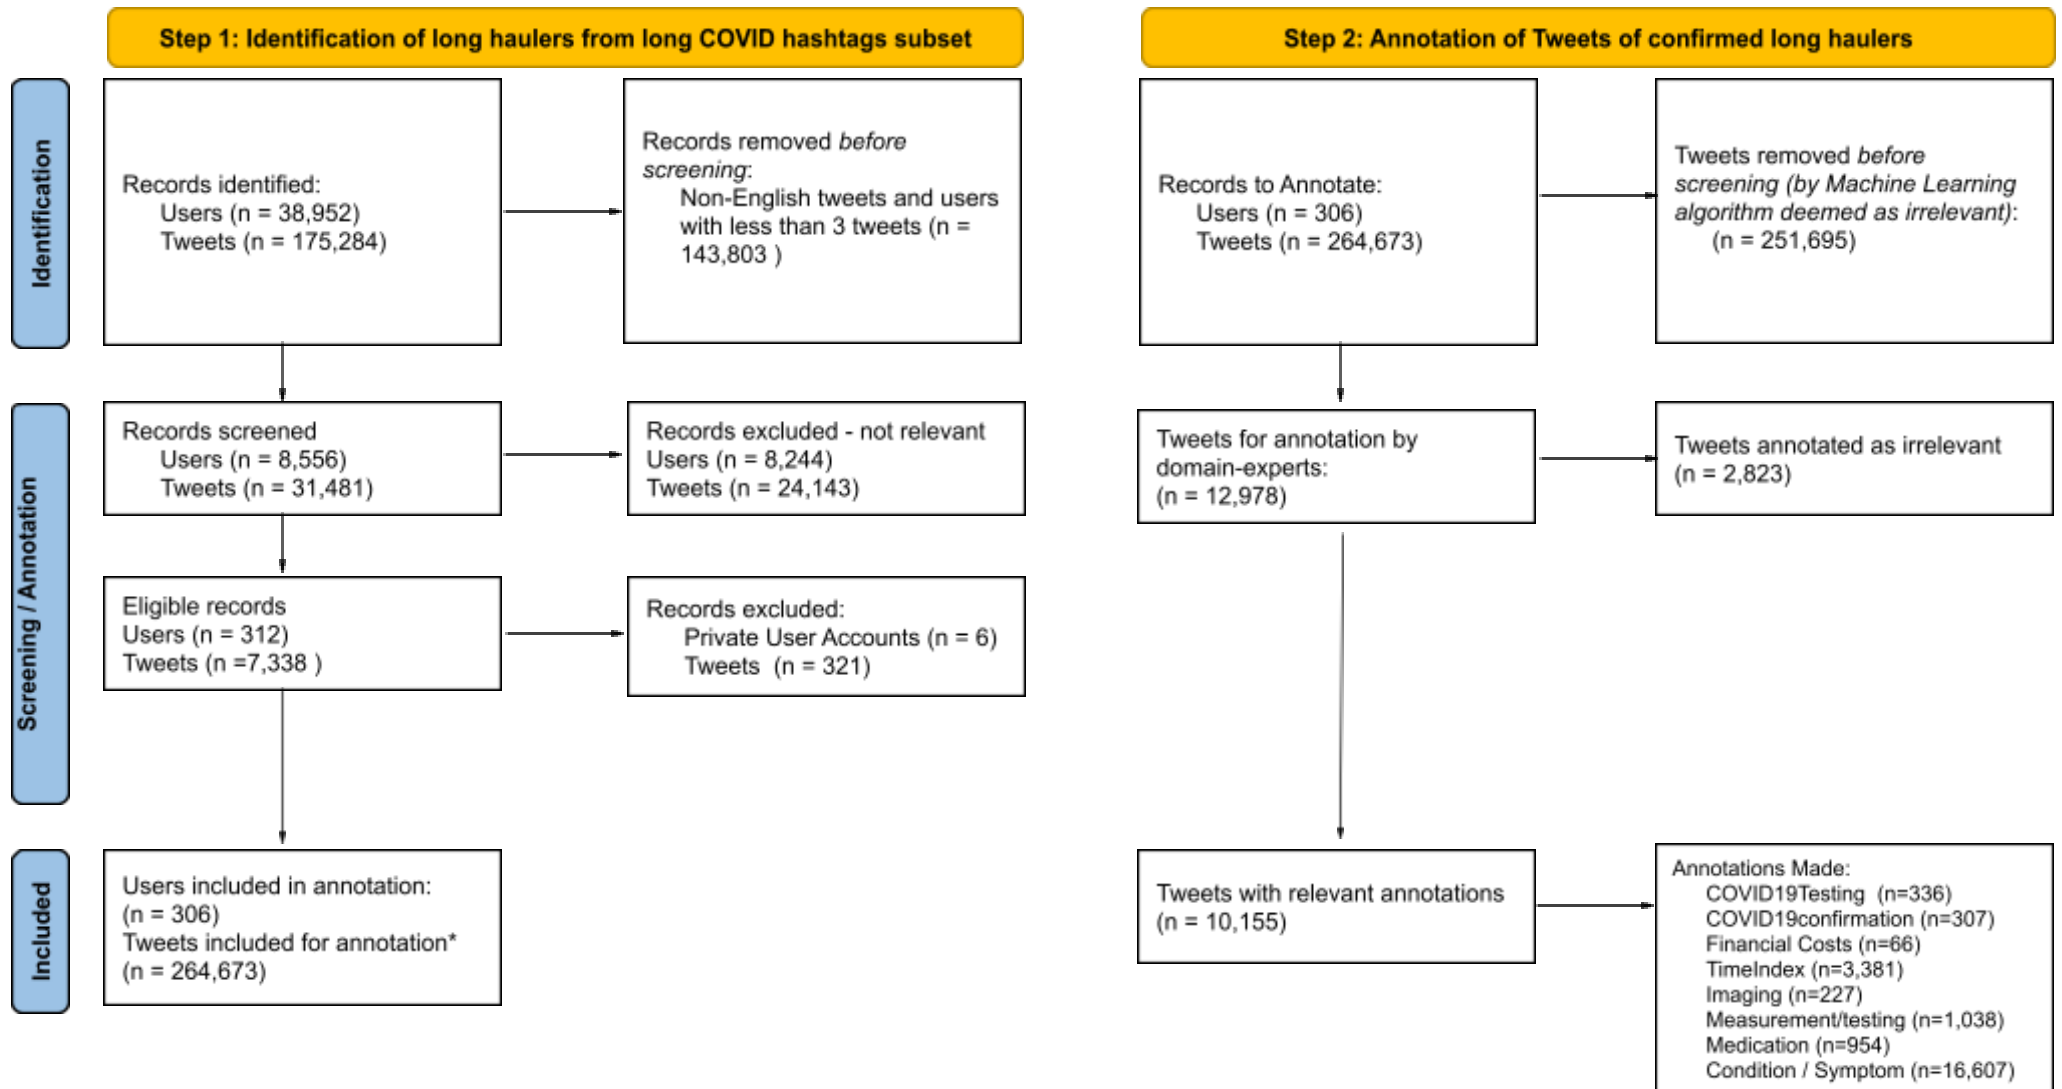

\* The number of Tweets here increased from 7,026 to 264,673 as we extracted the complete Twitter timeline tweets (between 2020-01-01 and 2020-08-17) for the 306 users.

Adapted from: Page MJ, McKenzie JE, Bossuyt PM, Boutron I, Hoffmann TC, Mulrow CD, et al. The PRISMA 2020 statement: an updated guideline for reporting systematic reviews. *BMJ* 2021;372:n71. doi: 10.1136/bmj.n71. For more information, visit: <http://www.prisma-statement.org/>
